# Supplementary material for: Cardiac Remodeling in the Absence of Cardiac Contractile Dysfunction Is Sufficient to Promote Cancer Progression
Source: MDPI journal article supplement (doi:10.3390/cells11071108), 2022-03-25
Supplement: s1 [file s1]

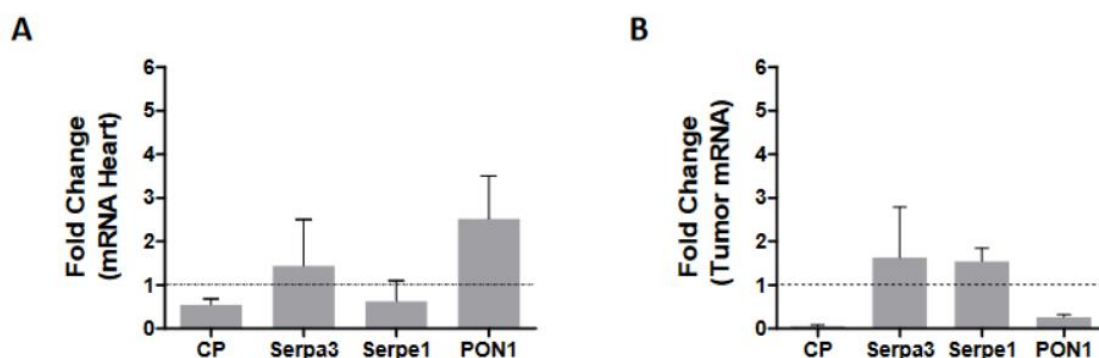

**Supplementary Figure S1.** Putative secreted factors that were found to be expressed alike in the PE-infused model. A B mRNA levels from either heart tissue (A) or tumor (B) of the indicated genes were measured by qRT-PCR. Data are presented as relative expression compared with control determined as 1. Data are presented as mean  $\pm$  SEM and analyzed by multiple Student t tests. \*  $p < 0.05$ . \*\*  $p < 0.01$ . \*\*\*  $p < 0.001$ .

**Supplementary Table S1.** Oligonucleotides used for qRT-PCR.

| Gene     | Forward                 | Reversed                 |
|----------|-------------------------|--------------------------|
| HSP90    | TCGTCAGAGCTGATGATGAAGT  | GCGTTTAACCCATCCAACCTGAAT |
| GAPDH    | TTGCCATCAACGACCCCTTCAT  | AGACTCCACGACATACTCAGCA   |
| ANP      | GCTTCCAGGCCATATTGGAG    | GGGGGCATGACCTCATCTT      |
| BNP      | GAGGTCACCTCTATCCTCTGG   | GCCATTTCTCCGACTTTTCTC    |
| ACTA1    | GTGAGATTGTGCGCGACATC    | GGCAACGGAAACGCTCATT      |
| Col1a    | CTGGCGGTTTCAGGTCCAAT    | TTCCAGGCAATCCACGAGC      |
| TGFb3    | CCTGGCCCTGCTGAACTTG     | GACGTGGGTCATCACCGAT      |
| ACTA2    | GTCCCAGACATCAGGGAGTAA   | TCGGATACTTCAGCGTCAGGA    |
| FN       | ATGTGGACCCCTCCTGATAGT   | GCCCAGTGATTTCAGCAAAGG    |
| POSTN    | CCTGCCCTTATATGCTCTGCT   | AAACATGGTCAATAGGCATCACT  |
| CTGF     | AGACCTGTGGGATGGGCAT     | GCTTGGCGATTTTAGGTGTCC    |
| PON1     | GCTGAAGACTTAGAGATTCTGCC | GTTTACCACCAGTAGGTACACAG  |
| Serpina3 | AGAGGAGCTAAACCTGCCCAA   | ATACGGCCTTACGAATGCCAC    |
| Serpine1 | CACCGTGAAGGTGCCTATGATG  | GGCATTGCCCAGGTATTTTCATC  |
| CP       | CTTAGCCTTGGCAAGAGATAAGC | GGCCTAAAAACCCTAGCCAGG    |

**Supplementary Table S2.** Echocardiography parameters for WT C57Bl6 mice: baseline (WT), tumor bearing (WT + Cancer) and PE infused tumor bearing (PE pumps + Cancer)

|          | <b>WT</b>    | <b>WT+Cancer</b> | <b>PE pumps + Cancer</b> |
|----------|--------------|------------------|--------------------------|
| IVSd;d-D | 0.82 ± 0.004 | 0.83 ± 0.09      | 0.83 ± 0.12              |
| LVID;d-D | 3.6 ± 0.27   | 3.81 ± 0.14      | 3.47 ± 0.24              |
| LVID;s-D | 2.39 ± 0.04  | 2.48 ± 0.04      | 2.25 ± 0.18              |
| LVPW;d-D | 0.77 ± 0.07  | 0.79 ± 0.06      | 0.77 ± 0.08              |
| FS (%)   | 33.35 ± 3.82 | 34.82 ± 1.84     | 35.07 ± 2.68             |
